# Supplementary material for: Modulation of the Primary Astrocyte-Enriched Cultures’ Oxylipin Profiles Reduces Neurotoxicity
Source: MDPI journal article supplement (doi:10.3390/metabo11080498), 2021-07-30
Supplement: s1 [file s1]

# Supplementary: Modulation of the primary astrocyte-enriched cultures oxylipin profiles reduces neurotoxicity

Maria V. Guruleva <sup>1</sup>, Dmitry V. Chistyakov <sup>2</sup>, Alexander V. Lopachev <sup>3</sup>, Sergei V. Goriainov <sup>4</sup>, Alina A. Astakhova <sup>2</sup>, Yulia A. Timoshina <sup>3,5</sup>, Anastasiya V. Khutorova <sup>3,5</sup>, Tatiana N. Fedorova <sup>3</sup>, and Marina G. Sergeeva <sup>2</sup>

<sup>1</sup> Faculty of Bioengineering and Bioinformatics, Moscow Lomonosov State University, Moscow 119234, Russia; [guruleva.mv@gmail.com](mailto:guruleva.mv@gmail.com)

<sup>2</sup> Belozersky Institute of Physico-Chemical Biology, Lomonosov Moscow State University, Moscow 119992, Russia; [alina\\_astakhova@yahoo.com](mailto:alina_astakhova@yahoo.com), [mg.sergeeva@gmail.com](mailto:mg.sergeeva@gmail.com)

<sup>3</sup> Laboratory of Clinical and Experimental neurochemistry, Research Center of Neurology, Moscow 125367, Russia; [lopachev@neurology.ru](mailto:lopachev@neurology.ru), [tnf51@bk.ru](mailto:tnf51@bk.ru)

<sup>4</sup> SREC PFUR Peoples' Friendship University of Russia (RUDN University), Moscow 117198, Russia; [goryainovs@list.ru](mailto:goryainovs@list.ru)

<sup>5</sup> Biological Department, Lomonosov Moscow State University, 119991 Moscow, Russia; [july.timoschina@yandex.ru](mailto:july.timoschina@yandex.ru), [hutorova.anastasiya@mail.ru](mailto:hutorova.anastasiya@mail.ru)

\* Correspondence: [Chistyakof@gmail.com](mailto:Chistyakof@gmail.com); Tel.: +74-95-939-4332

Table S1. Mean (SD) PUFAs and oxylipins released from astrocytes treated with ML355 and Zileuton alone or in combination with LPS for 24h fold to control.

| No           | LPS 24h      | ML355     | ML355 + LPS 24h | Zileuton  | Zileuton + LPS 24h |
|--------------|--------------|-----------|-----------------|-----------|--------------------|
| Sample       | mean ± SD    | mean ± SD | mean ± SD       | mean ± SD | mean ± SD          |
| EPA          | 0.21±0.04    | 1.21±0.34 | 0.27±0.06       | 2.02±0.39 | 0.22±0.03          |
| DHA          | 0.35±0.04    | 1.10±0.02 | 0.31±0.01       | 1.28±0.39 | 0.35±0.02          |
| AA           | 0.26±0.03    | 1.20±0.27 | 0.30±0.04       | 1.34±0.41 | 0.28±0.01          |
| 12-HHT       | 11.29±4.06   | 6.71±0.20 | 16.65±5.44      | 4.36±1.05 | 1.43±1.44          |
| 6-keto-PGF1a | 35.34±3.57   | 1.31±0.23 | 18.48±2.10      | 0.90±0.16 | 4.86±0.22          |
| PGA2+PGJ2    | 24.45±2.12   | 1.21±0.43 | 11.77±2.46      | 0.95±0.23 | 3.52±0.22          |
| PGE2         | 249.89±54.64 | 6.53±2.89 | 61.85±14.20     | 3.68±1.03 | 11.94±1.60         |
| PGD2         | 36.13±5.35   | 1.47±0.45 | 16.01±2.20      | 0.98±0.20 | 3.68±0.64          |

|              |            |           |           |           |           |
|--------------|------------|-----------|-----------|-----------|-----------|
| PGF2a        | 15.09±6.65 | 1.50±0.20 | 2.84±0.80 | 1.28±0.31 | 1.44±0.47 |
| TXB2         | 9.74±0.93  | 1.09±0.13 | 7.12±0.24 | 0.84±0.21 | 3.04±0.12 |
| 11-HETE      | 8.50±0.50  | 0.86±0.22 | 4.27±0.75 | 0.85±0.23 | 1.06±0.17 |
| 13-HDoHE     | 3.85±0.21  | 0.78±0.12 | 1.17±0.40 | 0.92±0.11 | 1.20±0.34 |
| 14.15-DHET   | 1.19±0.26  | 0.82±0.39 | 0.94±0.28 | 0.74±0.28 | 0.68±0.16 |
| 17.18-DiHETE | 1.12±0.07  | 1.09±0.16 | 0.94±0.05 | 0.83±0.37 | 1.23±0.02 |
| 12.13-DiHOME | 0.93±0.27  | 1.24±0.43 | 1.22±0.39 | 1.70±0.26 | 1.16±0.02 |
| 9.10-DiHOME  | 1.17±0.58  | 1.37±0.81 | 1.28±0.27 | 2.01±0.60 | 1.04±0.01 |
| 20-HDoHE     | 1.78±0.44  | 1.17±0.19 | 1.47±0.14 | 1.18±0.19 | 1.09±0.24 |
| 12-HETE      | 0.65±0.19  | 0.84±0.07 | 0.62±0.14 | 1.11±0.14 | 0.36±0.08 |
| 5-HETE       | 0.43±0.36  | 1.28±0.47 | 0.19±0.21 | 1.31±0.21 | 0.31±0.13 |
| 13-HODE      | 1.94±1.43  | 1.06±0.34 | 1.32±0.20 | 1.31±0.20 | 1.18±0.01 |
| 13-KODE      | 1.62±0.65  | 1.43±0.52 | 1.20±0.45 | 0.51±0.18 | 0.93±0.09 |
| 9-HODE       | 2.09±2.42  | 1.05±0.33 | 1.52±0.26 | 1.30±0.11 | 0.99±0.21 |
| 9-KODE       | 1.17±0.56  | 1.37±0.63 | 1.52±0.11 | 1.61±0.20 | 1.21±0.12 |
| 16-HDoHE     | 1.12±0.16  | 0.87±0.10 | 0.91±0.21 | 0.91±0.17 | 0.68±0.12 |
| 4-HDoHE      | 0.24±0.12  | 1.06±0.35 | 0.52±0.06 | 0.73±0.13 | 0.53±0.35 |
| 8-HDoHE      | 0.28±0.18  | 1.51±0.51 | 0.54±0.18 | 0.91±0.17 | 0.27±0.16 |

|          |           |           |           |           |           |
|----------|-----------|-----------|-----------|-----------|-----------|
| 14-HDoHE | 2.06±1.32 | 2.87±0.75 | 6.67±1.27 | 3.81±1.04 | 1.94±0.03 |
| 17-HDoHE | 1.05±0.53 | 1.13±0.28 | 1.39±0.36 | 0.51±0.11 | 0.23±0.04 |
| 11-HDoHE | 1.24±0.45 | 0.89±0.36 | 0.70±0.21 | 0.95±0.13 | 1.03±0.07 |
